# Supplementary material
Source: PubMed Central journal article supplement (PMC5023635)
Supplement: 11302_2016_9520_MOESM1_ESM.pdf [file 11302_2016_9520_MOESM1_ESM.pdf]

**Purinergic control of lysenin's transport and voltage-gating properties**

Sheenah Bryant<sup>1,2</sup>, Nisha Shrestha<sup>1,2</sup>, Paul Carnig<sup>1</sup>, Samuel Kosydar<sup>1</sup>, Philip Belzeski<sup>1</sup>, Charles Hanna<sup>1,2</sup>, Daniel Folega<sup>1,2,\*</sup>

<sup>1</sup>Department of Physics, Boise State University, Boise, ID 83725, United States

<sup>2</sup>Biomolecular Sciences PhD Program, Boise State University, Boise, ID 83725, United States

Corresponding Author

\*Email: DanielFolega@boisestate.edu, Phone: +1 208 426 2664, Fax: +1 208 426 4330

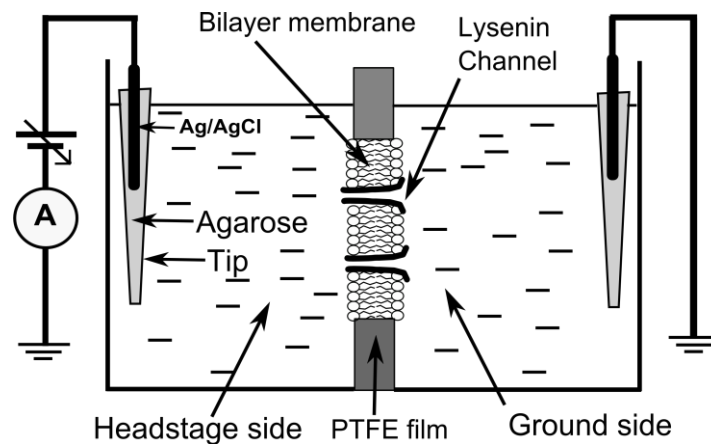

**Fig. 1** The experimental setup consisted of a custom-made planar bilayer lipid membrane chamber, which was comprised of two PTFE reservoirs, each capable of accommodating ~1 mL electrolyte solution. The two reservoirs were separated by a thin PTFE film (~120  $\mu\text{m}$  thickness) in which a small central hole of ~60  $\mu\text{m}$  diameter was produced by an electric spark. The agarose/Ag/AgCl electrodes immersed into the electrolyte solutions were connected through flexible wires to the electrophysiology amplifier

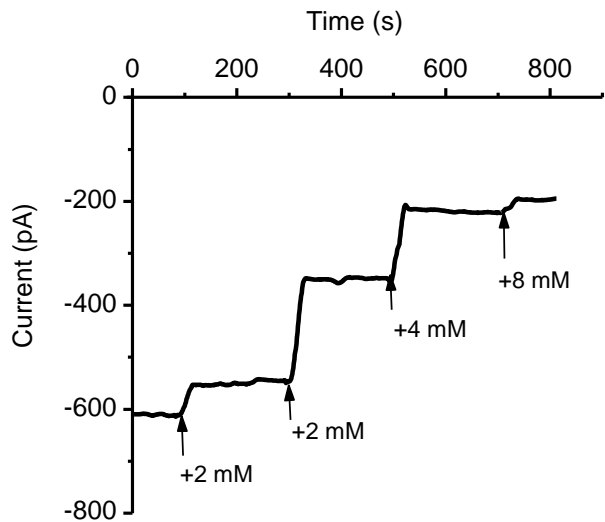

**Fig. 2** ATP inhibits the macroscopic currents through lysenin channels inserted into planar lipid membranes irrespective of the addition side. Addition of ATP to the headstage-wired solution yielded a significant decrease of the ionic currents in a concentration-dependent manner, similar to what was observed after ATP addition to the ground side (see the main text). The experiment was recorded at -60 mV transmembrane potential at a sampling rate of 1s, with a 1 kHz hardware filter and a 0.1 kHz software filter. Each ATP addition (indicated by arrows) increased the ATP concentration by the amount indicated in the figure
